# Supplementary material
Source: PubMed Central journal article supplement (PMC3675921)
Supplement: AEM.03934-12_zam999104434so1.pdf [file AEM.03934-12_zam999104434so1.pdf]

## **SUPPLEMENTARY ONLINE MATERIAL**

Diversity of benzylsuccinate synthase-like (*bssA*) genes in hydrocarbon-polluted marine sediments suggest substrate-dependent clustering

Alejandro Acosta-González<sup>1</sup>, Ramon Rosselló-Móra<sup>2</sup> and Silvia Marqués<sup>1#</sup>

Consejo Superior de Investigaciones Científicas, <sup>1</sup>Estación Experimental del Zaidín, Department of Environmental Protection, Profesor Albareda 1, E-18008 Granada, Spain. <sup>2</sup>Institut Mediterrani d'Estudis Avançats, IMEDEA, CSIC-UIB. C/. Miquel Marqués 21, 07190 Esporles, Illes Balears, Spain

### **The supplementary material includes :**

Figures S1 to S5

Tables S1 to S4

References

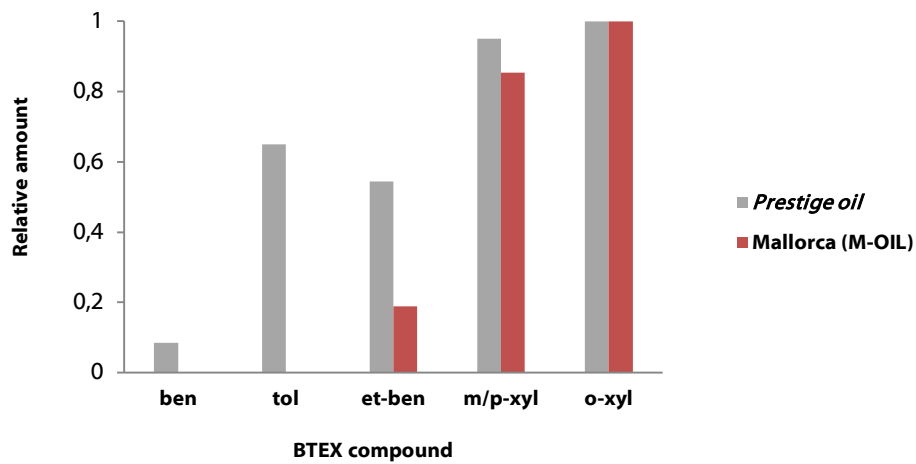

**Figure S1a.** Relative distribution of BTEX in M-OIL sample and in the original *Prestige oil* used in Mallorca microcosms. Ben (benzene), tol (toluene), et-ben (ethyl-benzene), *m/p-xyl* (*m*-xylene and *p*-xylene), *o-xyl* (*o*-xylene).

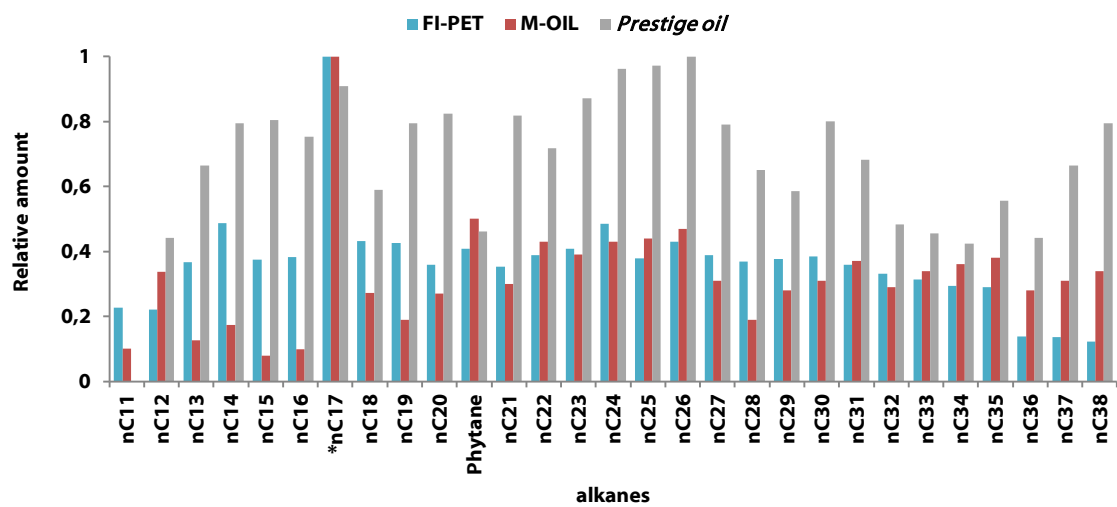

**Figure S1b.** Relative distribution of alkanes in most polluted samples. Data are compared with the *Prestige oil* fingerprinting described in Alzaga *et al.*, 2004 (1). \*sum of nC17 and pristane.

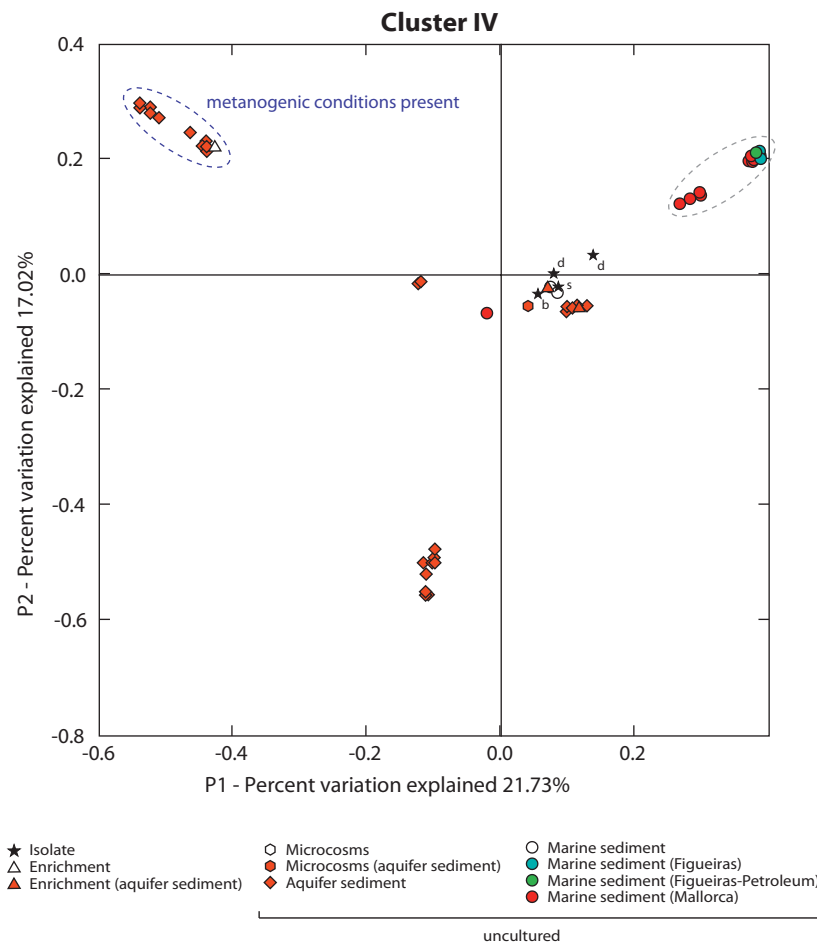

**Figure S2.** PCoA (Principal coordinate analysis) of distances between *assA* sequences present in the sediment samples collected from marine sediments (Figueiras beach, Rodas beach and Mallorca) and sequences available in the databases (see table S1). The positions of the sequences corresponding to isolates are labeled with a letter that indicates the taxonomic affiliation: *Betaproteobacteria* (b), *Desulfobacterales* (*Desulfatibacillum alkenivorans* AK-01) (d) and *Syntrophobacterales* (*Desulfoglaeba alkanexedens*) (s). The percentage of the variation between the samples by principal coordinate is indicated on the axes. A sequence cutoff of 2% of amino acid similarity (OTU<sub>0.02</sub>) was used to select the sequences for the analysis.

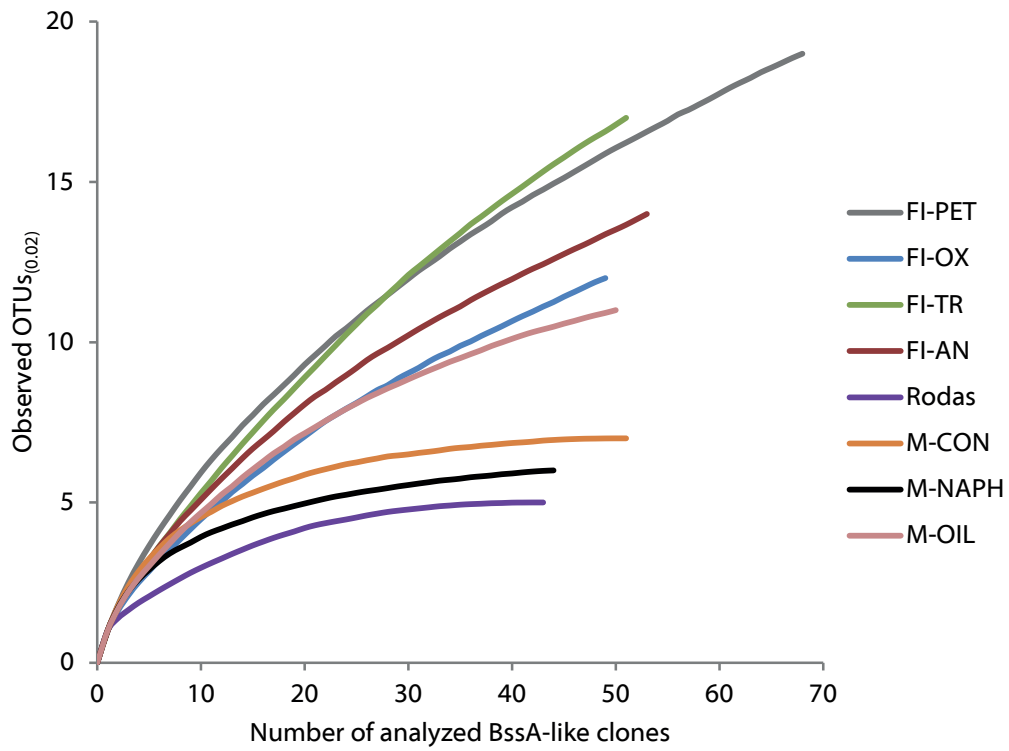

**Figure S3.** Rarefaction curves of the BssA-like sequences from sediments samples (FI, Figueiras; M, Mallorca) with a sequence cutoff of 2% of amino acid similarity (OTU<sub>0.02</sub>).

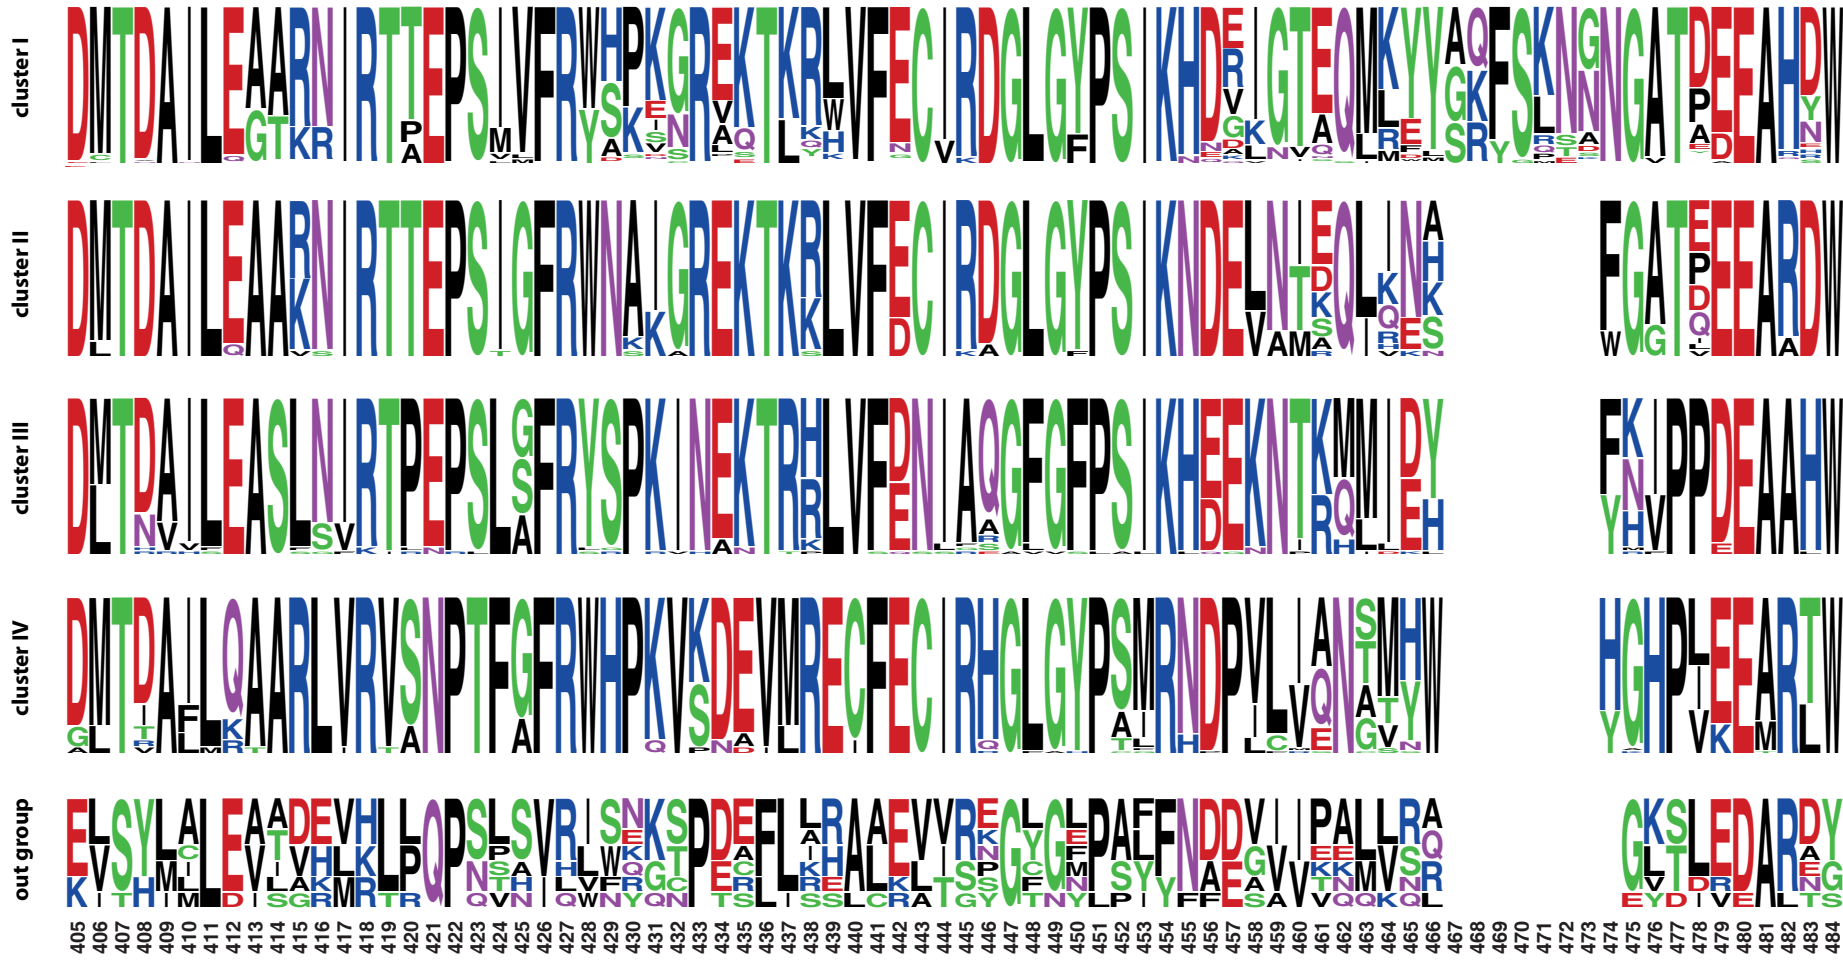

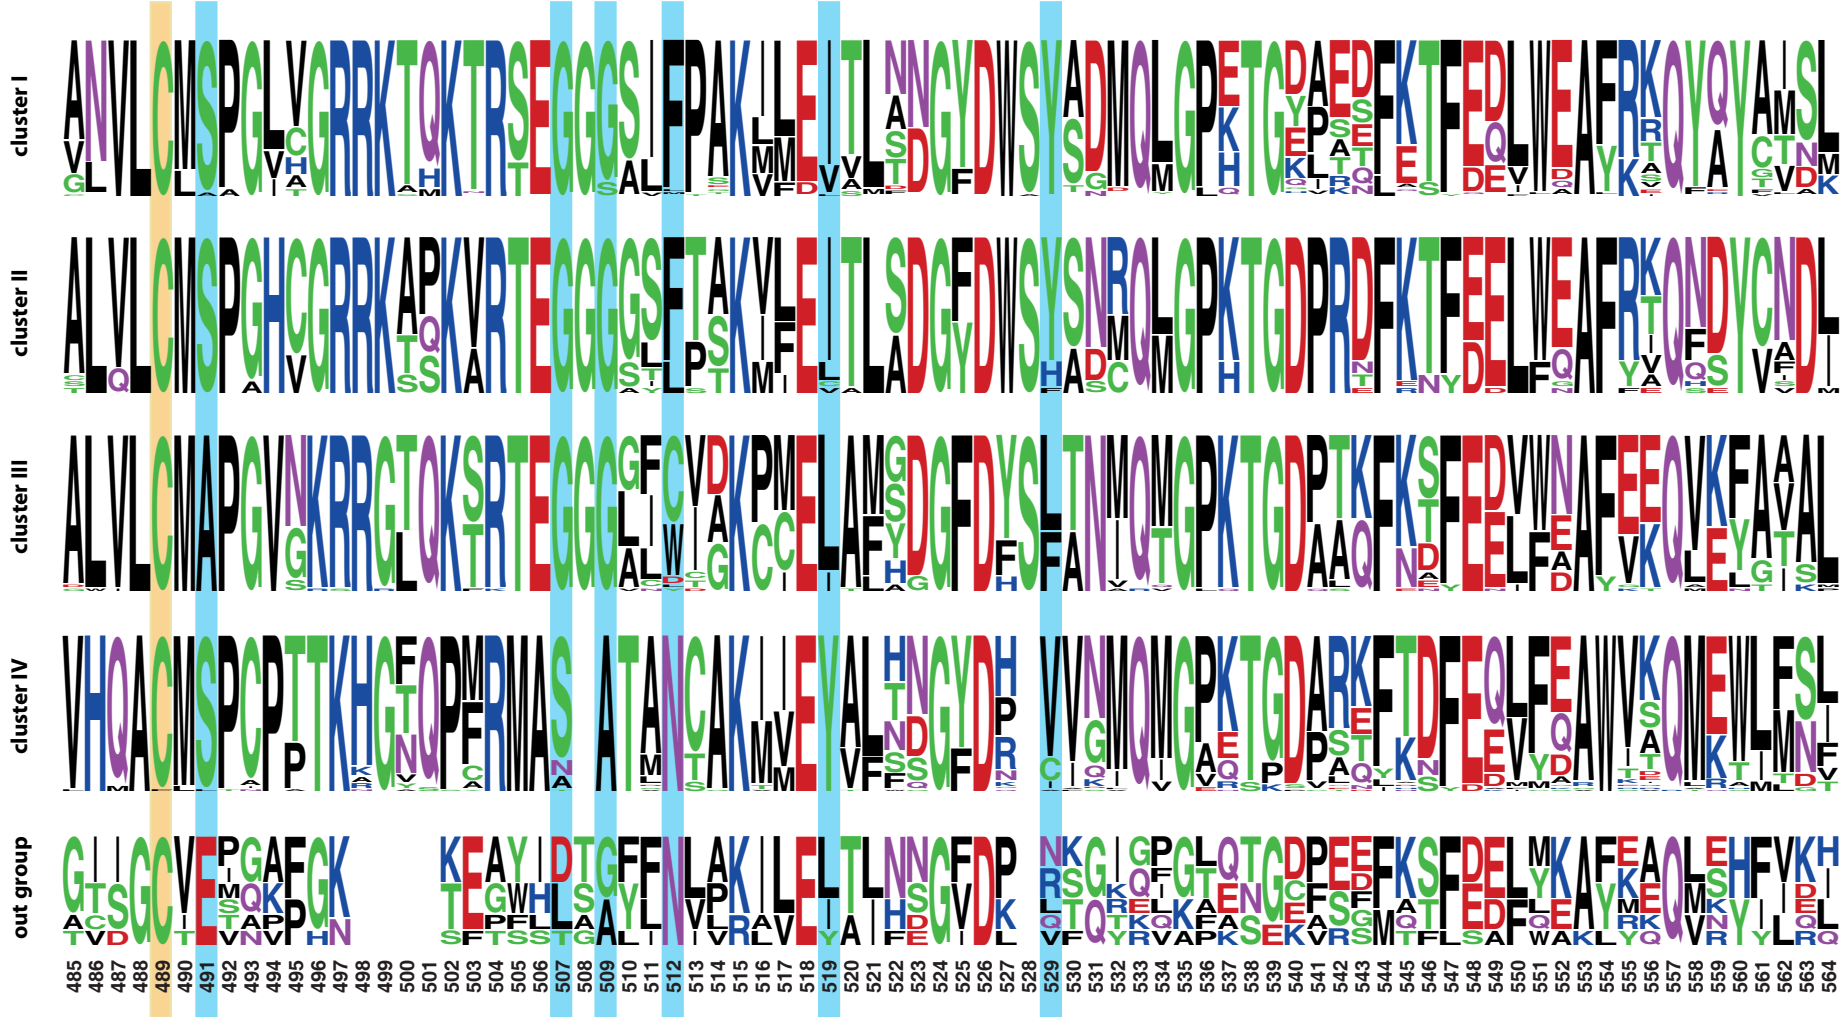

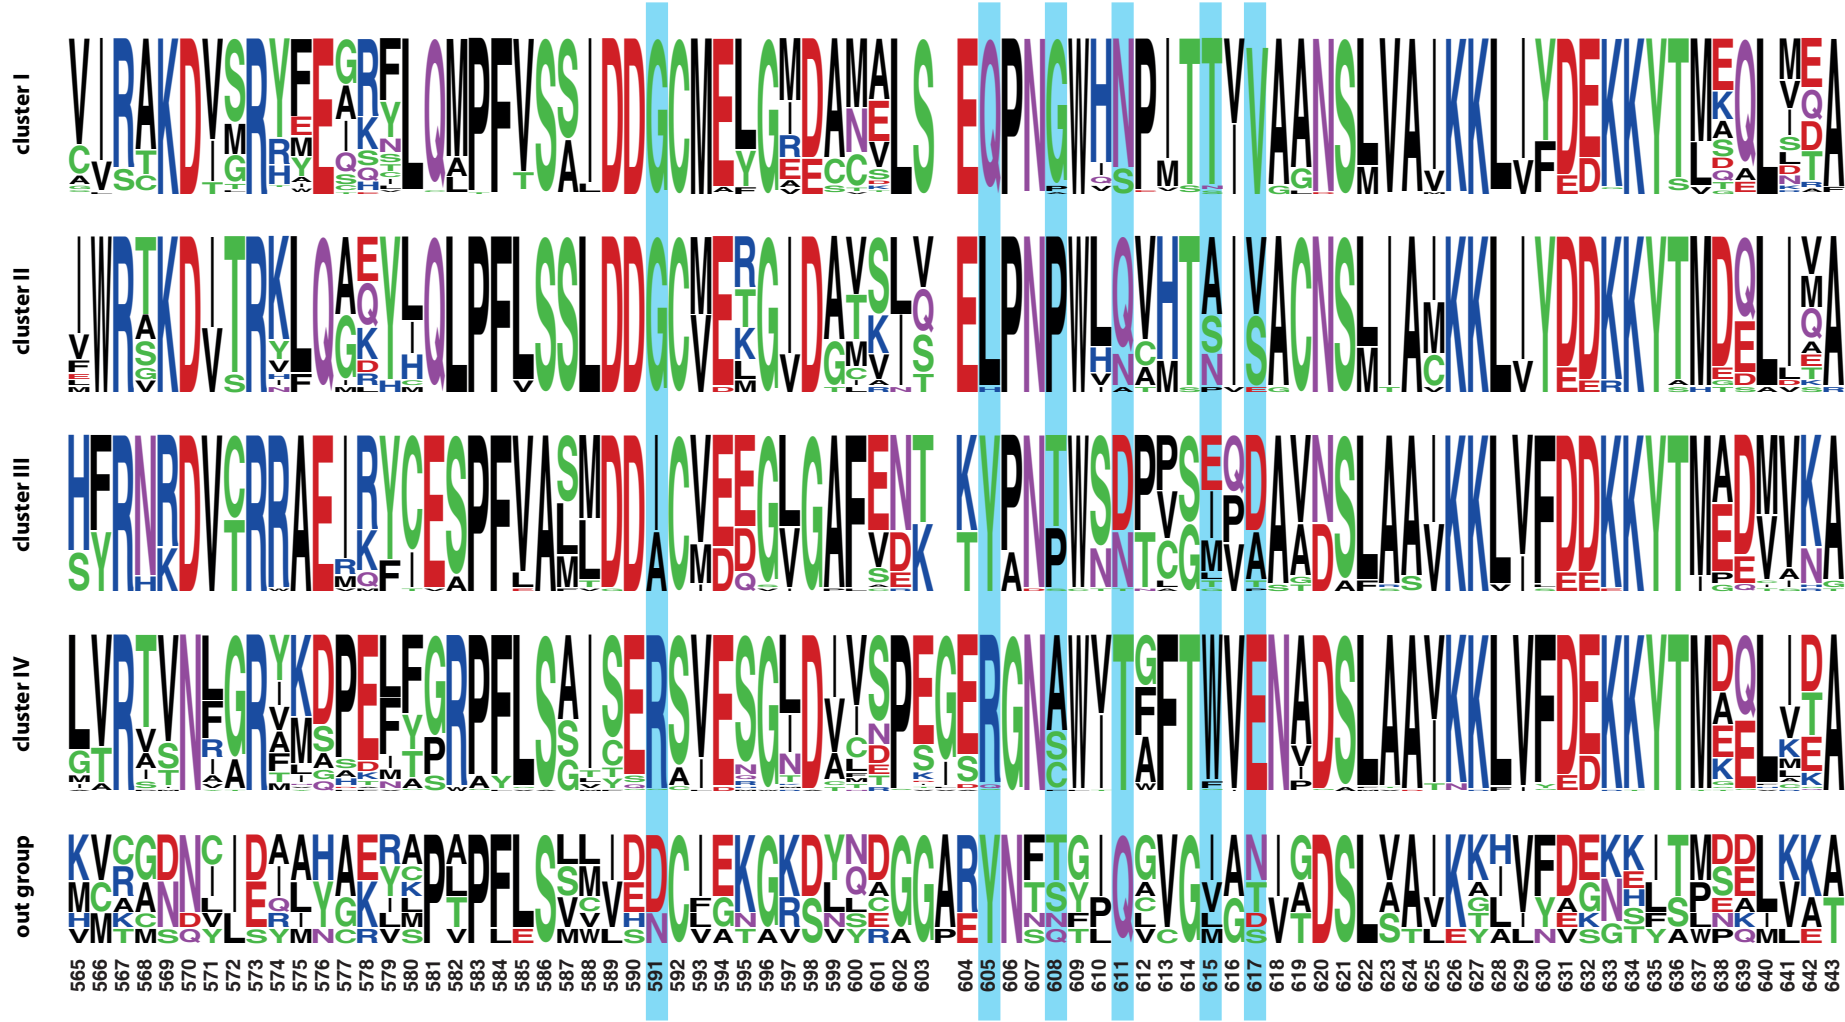

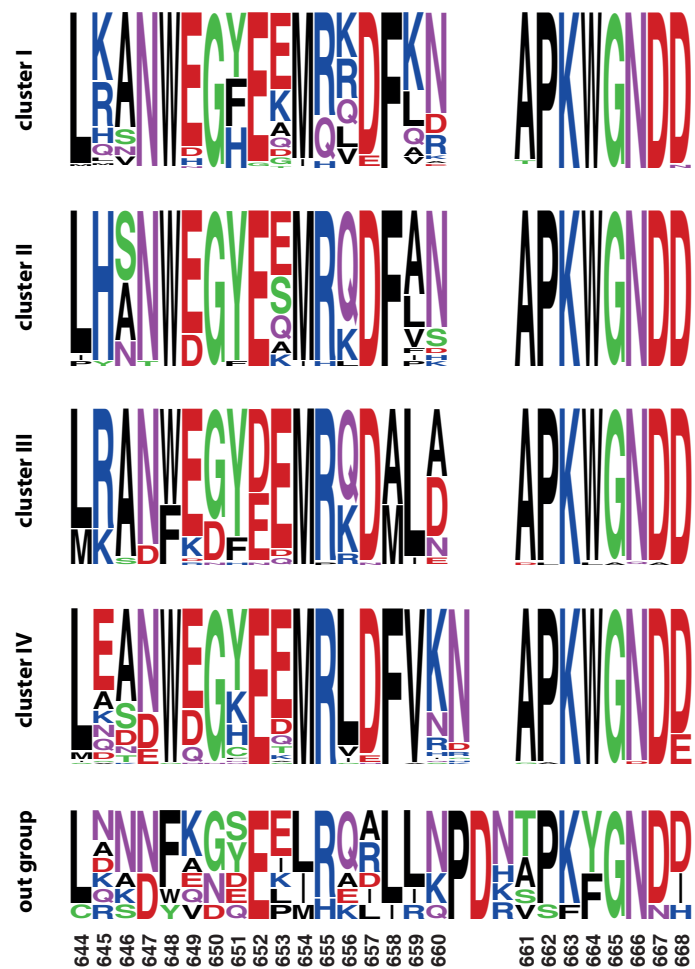

**Figure S4.** Alignment of the consensus sequences of the different clusters determined in the study showing the frequency profiles of amino acids at each position (logo). Position numbers refer to *Thauera aromatica* K172 sequence. The active site cysteine residue is highlighted in yellow, while the specificity relevant residues shown in Figure 4 are highlighted in blue.



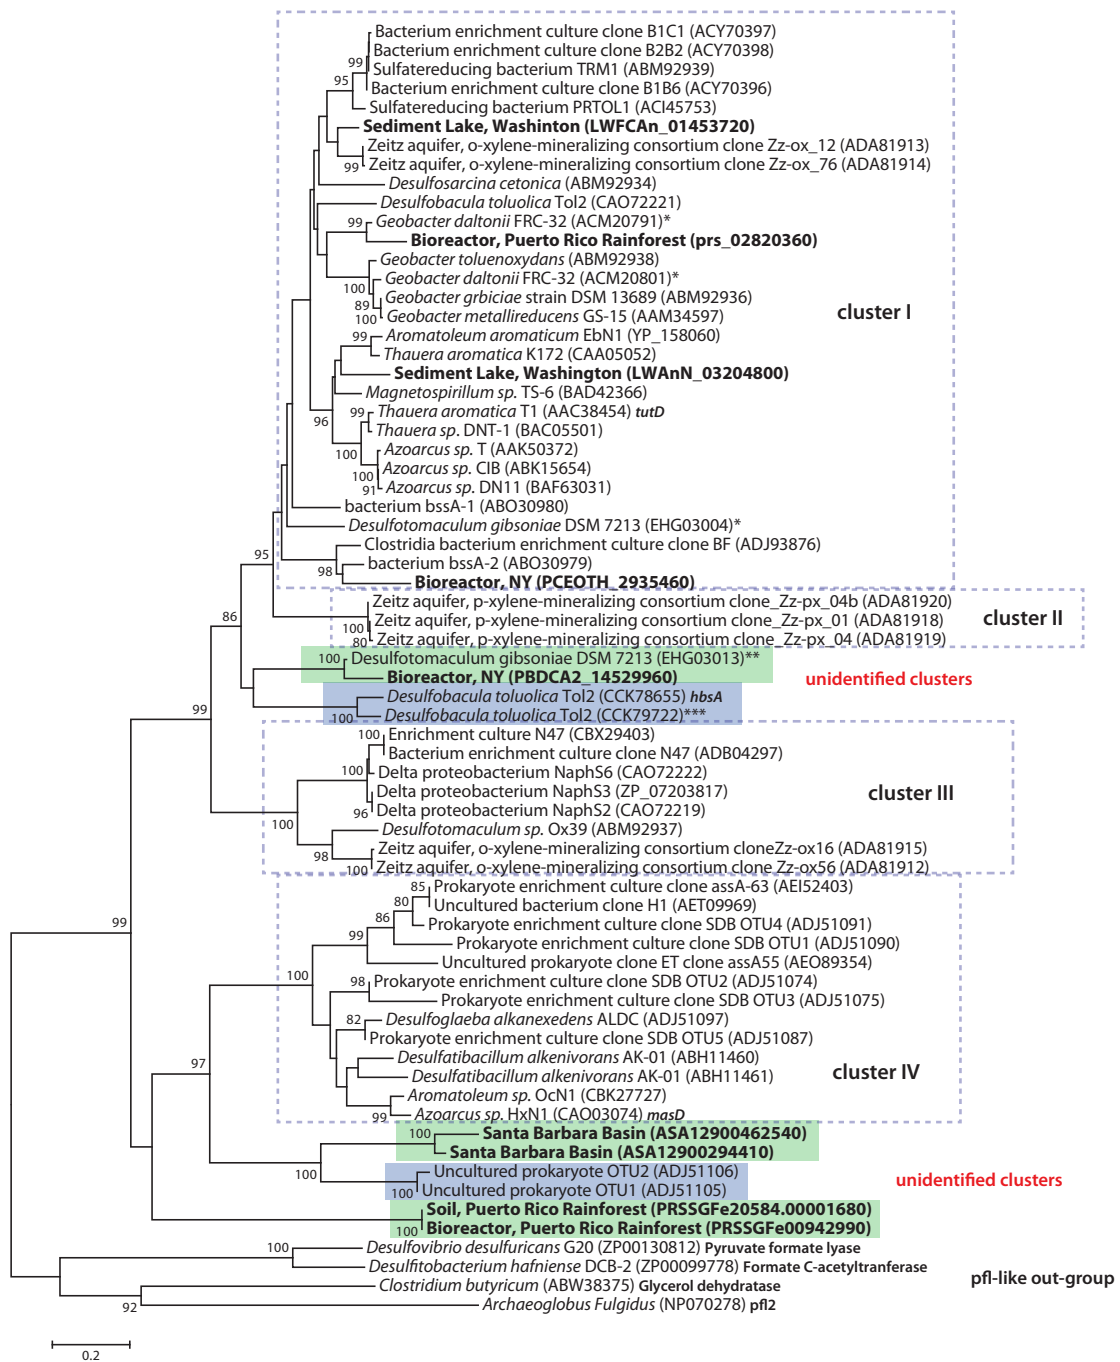

**Figure S5.** Unidentified clusters found in our analysis. The phylogenetic tree shows all BssA-like sequences from isolated strains and enrichment cultures deposited in databases and sequences annotated as putative pyruvate-formate lyase (pfl) enzymes from genomes and metadata (metagenomes). The analysis suggests the existence of non-classified clusters (highlighted in blue and green). Asterisks denote the sequences annotated as pfl from aromatic oxidizing strains that belong to cluster I (\*) or unidentified cluster (\*\*). A third sequence (BssA3) from *Desulfobacula toluolica* Tol2 annotated as BssA (2) groups in the HbsA cluster (\*\*\*) . The sequences retrieved from metagenomes are written in bold. Two sequences annotated as putative glycol radical enzymes from Callaghan *et al.*, 2010 (3) are included in the analysis (ADJ51105 and ADJ51106). Numbers in parentheses represents protein GenBank accession numbers or gene object ID (metagenomic data).

## References

1. **Alzaga R, Montuori P, Ortíz L, Bayona JM, Albaigés J.** 2004. Fast solid-phase extraction-gas chromatography-mass spectrometry procedure for oil fingerprinting: Application to the *Prestige* oil spill. *J Chromatogr A* **1025**:133-138.
2. **Wöhlbrand L, Jacob JH, Kube M, Mussmann M, Jarling R, Beck A, Amann R, Wilkes H, Reinhardt R, Rabus R.** 2012. Complete genome, catabolic sub-proteomes and key-metabolites of *Desulfobacula toluolica*Tol2, a marine, aromatic compound-degrading, sulfate-reducing bacterium. *Environmental Microbiology*:n/a-n/a.
3. **Callaghan AV, Davidova IA, Savage-Ashlock K, Parisi VA, Gieg LM, Suflita JM, Kukor JJ, Wawrik B.** 2010. Diversity of Benzyl- and Alkylsuccinate Synthase Genes in Hydrocarbon-Impacted Environments and Enrichment Cultures. *Environmental Science & Technology*.

**Table S1.** BssA-like sequences retrieved from the databases and used in the analysis.

| <i>bssA</i> like*                          | Protein acc. number | No. seq | Sample source                                                                         | Reported contaminants in the isolation source           | notes                                                                                    | Ref.                               |
|--------------------------------------------|---------------------|---------|---------------------------------------------------------------------------------------|---------------------------------------------------------|------------------------------------------------------------------------------------------|------------------------------------|
| <i>Thauera aromatica</i> strain T1         | AAC38454            | 1       | Untreated gasoline spill soil, California (USA)                                       | Gasoline                                                |                                                                                          | (1)                                |
| <i>Thauera aromatica</i> K172              | CAA05052            | 1       | Municipal sewage plant in Konstanz (Germany)                                          |                                                         | Anaerobic sludge                                                                         | (2)                                |
| <i>Azoarcus</i> sp. T                      | AAK50372            | 1       | Anaerobic, toluene-degrading Laboratory aquifer column.                               | Toluene                                                 | Column filled with material from the interface of a river-groundwater infiltration site. | (3)                                |
| <i>Geobacter metallireducens</i> GS15      | AAM34597            | 1       | Freshwater surficial bottom sediments, Potomac River.                                 |                                                         |                                                                                          | (4)                                |
| <i>Aromatoleum aromaticum</i> EbN1         | YP_158060           | 1       | Anoxic freshwater mud sampled in Bremen, Germany                                      |                                                         |                                                                                          | (5)                                |
| <i>Thauera</i> sp. DNT-1                   | BAC05501            | 1       | Anaerobic sludge from a wastewater treatment plant                                    |                                                         |                                                                                          | (6)                                |
| <i>Magnetospirillum</i> sp. TS6            | AD42366             | 1       | Soils from damp ground and rice paddies                                               |                                                         | Denitrifying <i>Alphaproteobacteria</i>                                                  | (7)                                |
| <i>Azoarcus</i> sp. CIB                    | ABK15654            | 1       |                                                                                       |                                                         |                                                                                          | Blazquez et al., 2006 <sup>1</sup> |
| <i>Azoarcus</i> sp. DN11                   | BAF63031            | 1       | Contaminated subsurface aquifer, Kumamoto (Japan)                                     | Gasoline-contaminated groundwater                       |                                                                                          | (8)                                |
| <i>Desulfosarcina cetonica</i> DSM 7267    | ABM92934            | 1       | Oil recovery water, Azerbaijan                                                        |                                                         |                                                                                          |                                    |
| <i>Geobacter grbiciae</i> strain DSM 13689 | ABM92936            | 1       | Freshwater sediment, estuary of the Potomac River, USA.                               |                                                         |                                                                                          | (9)                                |
| <i>Desulfotomaculum</i> sp. OX39           | ABM92937            | 1       | Sediment of a drilling core taken at a former gasworks plant near Stuttgart (Germany) | Monocyclic aromatics, PAHs, and heterocyclic compounds. |                                                                                          |                                    |

|                                            |                       |    |                                                                                      |                                                                |                                           |                                 |
|--------------------------------------------|-----------------------|----|--------------------------------------------------------------------------------------|----------------------------------------------------------------|-------------------------------------------|---------------------------------|
| <i>Geobacter toluenoxydans</i> TMJ1        | ABM92938              | 1  | Sediment from a near Stuttgart (Germany)                                             | Tar-oil-contaminated site                                      |                                           |                                 |
| Sulfate reducer TRM1                       | ABM92939              | 1  | Soil percolation column filled with material from a contaminated aquifer (Stuttgart) | BTEX                                                           |                                           |                                 |
| <i>Desulfobacula toluolica</i> strain Tol2 | CAO72221              | 1  | Marine sediment, Eel Pond                                                            |                                                                |                                           |                                 |
| Sulfate-reducing bacterium PRTOL1          | EU780921              | 1  | Naval Air Station, Patuxent River                                                    | Aviation fuel-contaminated soil                                |                                           | (10)                            |
| <i>Georgfuchsia toluolica</i> strain G5G6T | CBH30982              | 1  | Polluted aquifer, Banisveld (The Netherlands)                                        | BTEX-containing landfill leachate                              |                                           | (11)                            |
| <i>Geobacter daltonii</i> FRC-32           | ACM20791<br>ACM20801  | 2  | Contaminated shallow subsurface                                                      | mixed radionuclides, heavy metal and hydrocarbon contamination | Annotated as Formate C-acetyltransferase  | Lucas et al., 2009 <sup>1</sup> |
| <i>Desulfotomaculum gibsoniae</i> DSM 7213 | EHG03004              | 1  | freshwater mud                                                                       |                                                                | Annotated as pyruvate formate-lyase (PFL) | Lucas et al., 2011 <sup>1</sup> |
| Bacterium bssA-2                           | ABO30979              | 1  | Sand deposits at Pensacola aquifer (California)                                      | Nitrogen heterocycles, PAHs and phenols                        | toluene-degrading methanogenic consortium | (12)                            |
| Bacterium bssA-1                           | ABO30980              | 1  |                                                                                      |                                                                |                                           |                                 |
| Bacterium enrichment culture               | ADA81912-<br>ADA81917 | 6  | heavily contaminated former industrial field site Zeitz (Germany)                    | BTEX                                                           | <i>o</i> -xylene-mineralizing consortium  | (13)                            |
|                                            | ADA81918-<br>ADA81925 | 8  |                                                                                      |                                                                |                                           |                                 |
| Bacterium enrichment culture               | ACY70396-<br>ACY70398 | 3  | BTEX-contaminated aquifer near Zeitz (Germany)                                       | BTEX                                                           | Groundwater Enriched consortium Zz5-7     | (14)                            |
| Clostridia enrichment (clone BF)           | ADJ93876              | 1  | Soil of a former coal gasification site in Gliwice, Poland                           | Bencene                                                        | benzene-degrading and iron-reducing clone | (15)                            |
| uncultured bacterium                       | ABM91877-<br>ABM91886 | 10 | Former gasworks site, Testfeld Süd near Stuttgart (Germany)                          | Tar-oil-contaminated                                           | Contaminated aquifer sediments            | (9)                             |
|                                            | ABM91887-<br>ABM91896 | 10 | Contaminated Flingern aquifer sediments, Düsseldorf (Germany)                        |                                                                |                                           |                                 |
|                                            | ABM91897-<br>ABM91912 | 16 | Gasworks site in Pasing, Munich (Germany)                                            |                                                                |                                           |                                 |

|                                    |                                                 |    |                                                                                                  |                                                                                |                                                                                          |      |
|------------------------------------|-------------------------------------------------|----|--------------------------------------------------------------------------------------------------|--------------------------------------------------------------------------------|------------------------------------------------------------------------------------------|------|
| uncultured bacterium               | ADG27767-<br>ADG27785                           | 19 | Gasworks site, aquifer sediment,<br>Testfeld Süd, (Germany)                                      | Coal processing products,<br>BTEX, PAHs                                        | Toluene-degrading<br>'heavy' DNA (SIP)                                                   | (16) |
| uncultured prokaryote              | ADJ51098-<br>ADJ51100,<br>ADJ51102,<br>ADJ51103 | 5* | Oil refinery in Casper (Wyoming)                                                                 | Fuel and liquid propane<br>gas, gasoline, heavy fuel oil,<br>kerosene, asphalt | Contaminated aquifer<br>sediment                                                         | (17) |
|                                    | ADJ51101,<br>ADJ51104                           | 2  | Gas condensate-contaminated<br>Aquifer, South Platte alluvial<br>aquifer, Fort Lupton (Colorado) | 96% w/w C5-C15<br>compounds (18% w/w<br>BTEX)                                  |                                                                                          |      |
| uncultured bacterium               | ACR82309-<br>ACR82335                           | 27 | Groundwater, rural wooded area<br>in South Glens Falls (NY)                                      | Gas condensate, BTEX                                                           | Coal tar waste-<br>contaminated<br>groundwater                                           | (18) |
| uncultured <i>Thauera sp.</i>      | AFB74483,<br>AFB74485-<br>AFB74487              | 4  | Granular sludge nitrate amended<br>(Washington)                                                  | BTEX                                                                           | Toluene degrading<br>microcosms                                                          | (19) |
|                                    | AFB74484                                        | 1  | Agricultural soil nitrate amended<br>(Michigan)                                                  |                                                                                |                                                                                          |      |
| uncultured <i>desulfobacterium</i> | AFB74488                                        | 1  | Contaminated soil sulfate<br>amended (Michigan)                                                  |                                                                                |                                                                                          |      |
| uncultured bacterium               | AFB74489                                        | 1  |                                                                                                  |                                                                                |                                                                                          |      |
| uncultured bacterium               | AEO79008-<br>AEO79010                           | 3  | Oily sludge                                                                                      | Oil                                                                            | Incubated for 500-days<br>under methanogenic<br>conditions without any<br>carbon sources | (20) |
| uncultured prokaryote              | AEY68269                                        | 1  | Production water from Shengli<br>oilfield, Shangdong (China)                                     | moderately heavy oil                                                           | Methanogenic<br>enrichments cultures                                                     | (21) |
| uncultured bacterium               | AFX62232-<br>AFX62236                           | 5  | Amon mud volcano station 929                                                                     |                                                                                |                                                                                          | (22) |
|                                    | AFX62237                                        | 1  | Gulf of Mexico, hydrocarbon seep<br>dive 161                                                     |                                                                                |                                                                                          |      |
|                                    | AFX62238-<br>AFX62277,<br>AFX73928-<br>AFX73934 | 47 | Contaminated Flingern aquifer<br>sediments, Düsseldorf (Germany).                                | Tar-oil contaminated                                                           | Contaminated aquifer<br>sediments. Sampling<br>from 2009.                                |      |

| <i>nmsA</i> like*                                                              | Protein acc. number   | No. seq | Sample source                                                  | Reported contaminants in the isolation source | notes                                                        | Ref.      |
|--------------------------------------------------------------------------------|-----------------------|---------|----------------------------------------------------------------|-----------------------------------------------|--------------------------------------------------------------|-----------|
| delta proteobacterium NaphS2                                                   | CAO72219              | 1       | North Sea sediment (Germany)                                   |                                               | Anaerobically incubated medium with sulfate and naphthalene. | (23)      |
| delta proteobacterium NaphS3                                                   | CAO72220              | 1       | Etang de Berre marine sediment, Mediterranean lagoon (France)  |                                               |                                                              |           |
| delta proteobacterium NaphS6                                                   | CAO72222              | 1       |                                                                |                                               |                                                              |           |
| bacterium enrichment culture clone N47                                         | ADB04297              | 1       | contaminated aquifer near Stuttgart (Germany)                  |                                               | Sulfate reducing conditions with naphthalene.                | (24)      |
| uncultured bacterium                                                           | AFX62278              | 1       | Amon mud volcano station 929                                   |                                               | Contaminated aquifer sediments. Sampling from 2009.          | (22)      |
|                                                                                | AFX62279-<br>AFX62293 | 15      | Gulf of Mexico, hydrocarbon seep dive 161                      |                                               |                                                              |           |
|                                                                                | AFX62294-<br>AFX62301 | 8       | Guaymas hydrocarbon seep, dive 4573                            |                                               |                                                              |           |
|                                                                                | AFX62302-<br>AFX62320 | 19      | Contaminated Flingern aquifer sediments, Düsseldorf (Germany). | Tar-oil contaminated                          |                                                              |           |
| <i>hbsA</i>                                                                    | Protein acc. number   | No. seq | Sample source                                                  | Reported contaminants in the isolation source | notes                                                        | Reference |
| <i>Desulfobacula toluolica</i> strain Tol2                                     | CCK78655              | 1       | Marine sediment, Eel Pond                                      |                                               | Hydroxybenzylsuccinate synthase subunit A                    | (25)      |
|                                                                                | CCK79722              | 1       |                                                                |                                               | Annotated as <i>bssA</i> in the NCBI database                |           |
| <i>assA</i>                                                                    | Protein acc. number   | No. seq | Sample source                                                  | Reported contaminants in the isolation source | notes                                                        | Reference |
| <i>Desulfatibacillum alkenivorans</i> AK-01 (sulfate-reducing bacterium AK-01) | ABH11460              | 2       | Estuarine sediment, Arthur Kill waterway (NY/NJ)               | Oil contaminated sediments                    |                                                              | (26)      |
|                                                                                | ABH11461              |         |                                                                |                                               |                                                              |           |
| <i>Desulfoglaeba alkanexedens</i> ALDC                                         | ADJ51097              | 1       | Naval storage facility, VA (USA)                               | Oily wastewater                               |                                                              | (17)      |
| <i>Aromatoleum</i> sp. OcN1                                                    | CBK27727              | 1       | Sediment samples from ditches in Bremen (Germany)              |                                               |                                                              | (27)      |
| <i>Azoarcus</i> sp. HxN1                                                       | CAO03074              | 1       |                                                                |                                               |                                                              | (28)      |

|                       |                                                                           |    |                                                             |                                                         |                                                                                          |                                 |
|-----------------------|---------------------------------------------------------------------------|----|-------------------------------------------------------------|---------------------------------------------------------|------------------------------------------------------------------------------------------|---------------------------------|
| prokaryote enrichment | ADJ51074,<br>ADJ51075,<br>ADJ51087,<br>ADJ51090,<br>ADJ51091              | 5  | Marine sediments, Paletta Creek site in San Diego Bay (CA)  | Oil                                                     | Methanogenic, octacosane (C <sub>28</sub> H <sub>58</sub> )-degrading enrichment culture | (17)                            |
| uncultured prokaryote | ADJ51096                                                                  | 1  | North of Zodletone Mountain in the Anadarko Basin, OK (USA) |                                                         | Sulfate-reducing conditions with propane                                                 |                                 |
| uncultured prokaryote | AEO89352-<br>AEO89354                                                     | 3  | Oily sludge incubated for 500-days                          |                                                         | Methanogenic conditions                                                                  | (20)                            |
| prokaryote enrichment | AEI52403-<br>AEI52425                                                     | 23 |                                                             |                                                         | Methanogenic alkane degrading enrichment culture                                         |                                 |
| uncultured bacterium  | AET09969-<br>AET09982                                                     | 14 | Contaminated soil, Shengli oil field, eastern China         | Oil                                                     | Methanogenic hexadecane-degrading consortium enriched with crude oil                     | Cheng et al., 2011 <sup>1</sup> |
| uncultured prokaryote | ADJ51068,<br>ADJ51077,<br>ADJ51079-<br>ADJ51081,<br>ADJ51084-<br>ADJ51086 | 8  | Contaminated aquifer sediment, Passaic River (NJ)           |                                                         |                                                                                          |                                 |
|                       | ADJ51076,<br>ADJ51078,<br>ADJ51083,<br>ADJ51088,<br>ADJ51089              | 5  | Contaminated river sediment, Gowanus Canal (NY)             | Sites have been negatively impacted by petroleum spills |                                                                                          | (17)                            |
|                       | ADJ51082,<br>ADJ51094                                                     | 2  | Contaminated river sediment, Newtown Creek (NY)             |                                                         |                                                                                          |                                 |
|                       | ADJ51069-<br>ADJ51072,<br>ADJ51095                                        | 5  | Contaminated river sediment, Arthur Kill waterway (NY/NJ)   |                                                         |                                                                                          |                                 |

|                                                                                     |                                                |                    |                                                                                                  |                                                          |                                                                        |                                    |
|-------------------------------------------------------------------------------------|------------------------------------------------|--------------------|--------------------------------------------------------------------------------------------------|----------------------------------------------------------|------------------------------------------------------------------------|------------------------------------|
|                                                                                     | ADJ51073,<br>ADJ51092,<br>ADJ51093             | 3                  | Gas condensate-contaminated<br>aquifer, South Platte alluvial<br>aquifer, Fort Lupton (Colorado) | 96% w/w C5-C15<br>compounds and 18% w/w<br>BTEX          | Sulfate- reducing and<br>methanogenic<br>conditions                    |                                    |
|                                                                                     | ADJ51096                                       | 1                  | Zodletone spring water, Anadarko<br>Basin (OK)                                                   | Methane, ethane, and<br>propane                          | Anoxic water                                                           |                                    |
| uncultured bacterium                                                                | AFX62321-<br>AFX62322                          | 2                  | Guaymas hydrocarbon seep, dive<br>4573                                                           |                                                          |                                                                        | (22)                               |
| <b>Unidentified clusters<br/>(annotated as pfl like)</b>                            | <b>Protein acc.<br/>number</b>                 | <b>No.<br/>seq</b> | <b>Sample source</b>                                                                             | <b>Reported contaminants in<br/>the isolation source</b> | <b>notes</b>                                                           | <b>Reference</b>                   |
| uncultured prokaryote                                                               | ADJ51105-<br>ADJ51106                          | 2                  | Gas condensate-contaminated<br>aquifer, South Platte alluvial<br>aquifer, Fort Lupton (Colorado) | 96% w/w C5-C15<br>compounds and 18% w/w<br>BTEX          | Sediments under<br>sulfate- reducing and<br>methanogenic<br>conditions | (17)                               |
| <i>Desulfotomaculum gibsoniae</i> DSM 7213                                          | EHG03013                                       | 1                  | freshwater mud                                                                                   |                                                          | Annotated as pyruvate<br>formate-lyase (PFL)                           | Lucas et al.,<br>2011 <sup>1</sup> |
| <b>Unidentified clusters<br/>(Metagenomic projects)</b>                             | <b>Gene object ID</b>                          |                    | <b>Sample source</b>                                                                             | <b>Reported contaminants in<br/>the isolation source</b> | <b>Notes</b>                                                           | <b>Reference</b>                   |
| Poplar biomass microbial communities<br>from Brookhaven National Lab, NY            | PBDCA2_14529960                                |                    | Bioreactor                                                                                       | Solid waste                                              | Sample from total<br>biomass decay<br>community                        |                                    |
| Methane oxidizing archaeal<br>communities from Santa Brabara Basin                  | ASA129_00294410<br>ASA129_00462540             |                    | Marine sediment, Santa Barbara<br>Basin (ANME Sed A12 9-12 cm)                                   |                                                          |                                                                        | IMG/M<br>database <sup>1</sup>     |
| Microbial communities from Puerto<br>Rico rain forest that decompose<br>switchgrass | PRSSGFe_00942990<br>PRSSGFe2_0584.000016<br>80 |                    | Soil                                                                                             |                                                          |                                                                        |                                    |
| <b>Discharged <i>bssA</i> like<sup>2</sup><br/>(Metagenomic projects)</b>           | <b>Gene object ID</b>                          |                    | <b>Sample source</b>                                                                             | <b>Reported contaminants in<br/>the isolation source</b> | <b>Notes</b>                                                           | <b>Reference</b>                   |
| Microbial communities from Lake<br>Washington                                       | LWFCAn_01453720<br>LWAnN_03204800              |                    | Sediment, Lake Washington,<br>Seattle (USA)                                                      |                                                          | Methane and Nitrogen<br>Cycles (Flow sorted<br>aerobic + nitrate)      | IMG/M<br>database <sup>1</sup>     |



---

|                                                                                  |                |            |                                     |
|----------------------------------------------------------------------------------|----------------|------------|-------------------------------------|
| Green-waste compost microbial community from solid state bioreactor, Puerto Rico | prs_02820360   | Compost    | Solid waste                         |
| PCE-dechlorinating microbial communities from Ithaca, NY                         | PCEOTH_2935460 | Bioreactor | Tetrachloroethylene and derivatives |

---

\* *bssA* like and *nmsA* like refers to BssA and NmsA *sensu lato* sequences, respectively.

<sup>1</sup> unpublished

<sup>2</sup> these sequences do not share  $\geq 80\%$  of the same region. They were included only for the analysis of Figure S6.

**Table S2a.** BTEX composition in the sediment samples.

|                                           | <b>BTEX compound (ppb)</b> |              |             |                |              |
|-------------------------------------------|----------------------------|--------------|-------------|----------------|--------------|
|                                           | <b>Ben</b>                 | <b>EtBen</b> | <b>Tol</b>  | <b>m/p-xyl</b> | <b>o-xyl</b> |
| <b>FI-PET</b>                             | nd                         | nd           | nd          | blq            | blq          |
| <b>M-OIL</b>                              | nd                         | 16.1 ± 2.1   | nd          | 73.6 ± 13.5    | 86.2 ± 14.3  |
| <b>Prestige Oil<br/>(x10<sup>3</sup>)</b> | 0.16 ± 0.02                | 1.26 ± 0.16  | 1.04 ± 0.11 | 1.82 ± 0.16    | 1.91 ± 0.12  |

**Ben** (benzene); **EtBen** (Ethylbenzene), **Tol** (toluene), **m/p-xyl** (m-xylene and p-xylene), **o-xyl** (o-xylene)

**nd** = not detected

**blq** = below limit of quantification (<1 ppb)

**Table S2b.** PAHs composition in the sediment samples.

|                                 | <b>PAH compound (ppm)</b> |             |                   |             |             |            |
|---------------------------------|---------------------------|-------------|-------------------|-------------|-------------|------------|
|                                 | <b>N</b>                  | <b>1-MN</b> | <b>2-MN</b>       | <b>N2</b>   | <b>N3</b>   | <b>N4</b>  |
| <b>RI</b>                       | 1.28 ± 0.96               | nd          | 0.12 ± 0.17       | nd          | nd          | nd         |
| <b>FI-OX</b>                    | 0.10 ± 0.04               | 0.12 ± 0.3  | 1.5 ± 1.09        | nd          | nd          | nd         |
| <b>FI-TR</b>                    | 0.07 ± 0.02               | nd          | 0.42 ± 0.21       | nd          | nd          | nd         |
| <b>FI-AN</b>                    | 0.05 ± 0.01               | nd          | 0.03 ± 0.01       | nd          | nd          | nd         |
| <b>FI-PET</b>                   | 4.3 ± 1.91                | 2.52 ± 1.07 | 27.55 ± 6.1       | 22.5 ± 3.94 | 46.2 ± 13.2 | 25.1 ± 4.8 |
| <b>M-CON</b>                    | 0.0064 ± 0.00             | nd          | nd                | nd          | nd          | nd         |
| <b>M-NAP</b>                    | 0.053 ± 0.00              | nd          | blq               | nd          | nd          | nd         |
| <b>M-OIL</b>                    | 0.71 ± 0.22               | 0.07 ± 0.04 | 0.91 ± 0.37       | 0.21 ± 0.06 | 0.09 ± 0.02 | nd         |
| <b>Prestige Oil<sup>a</sup></b> | 345                       |             | 1076 <sup>1</sup> | 1232        | 1017        | no data    |

Naphthalene (**N**), 1-methylnaphthalene (**1-MN**), 2-methylnaphthalene (**2-MN**), dimethylnaphthalene (**N2**), trimethylnaphthalene (**N3**), tetramethylnaphthalene (**N4**).

<sup>1</sup> Sum of 1-MN and 2-MN.

<sup>a</sup> Data for the Prestige oil fingerprinting analysis described in Alzaga et al., 2004.

\*Methylated compounds with C1, C2 and C3 groups

**nd** = not detected

**blq** = below limit of quantification (<1 ppb)

**Table S3.** Most Probable Number of aromatic degrading bacteria in the Mallorca sediment microcosms and Atlantic Islands sediments.

|                               |                         | Carbon source   |                |                 |                  |                   |                |                 |
|-------------------------------|-------------------------|-----------------|----------------|-----------------|------------------|-------------------|----------------|-----------------|
|                               | Treatment               | Oil (CI (95%))  | Ben (CI (95%)) | Tol (CI (95%))  | An (CI (95%))    | Naph (CI (95%))   | Ac (CI (95%))  |                 |
| Mallorca                      | SRB (x10 <sup>3</sup> ) | None            | 23 (10-170)    | 9.2 (1-17)      | 9.2 (1-17)       | 2.3 (0.6-8)       | 0.21 (0.0-0.7) | 92 (10-170)     |
|                               |                         | Naph            | 42 (10-170)    | 4.2 (1-17)      | 4.2 (1-17)       | 2.3 (0.6-8)       | 0.92 (0.2-3)   | 42 (10-170)     |
|                               |                         | Oil             | 92 (10-170)    | 15 (10-170)     | 15 (10-170)      | 14 (10-170)       | 0.92 (0.2-3)   | 150 (10-170)    |
|                               | IRB (x10)               | None            | -              | -               | -                | -                 | -              | 230 (66-800)    |
|                               |                         | Naph            | 2.3 (0.6-8)    | -               | -                | 4.2 (1-17)        | -              | 70 (16-300)     |
|                               |                         | Oil             | -              | 2.3 (0.6-8)     | 0.92 (0.2-3.7)   | -                 | -              | 210 (61-730)    |
|                               | MnRB (x10)              | None            | 2.3 (0.6-8)    | -               | 0.92 (0.2-3.7)   | -                 | -              | 210 (61-730)    |
|                               |                         | Naph            | 2.3 (0.6-8)    | 0.36 (0.05-2.5) | 0.92 (0.2-3.7)   | 0.92 (0.2-3.7)    | -              | 23 (6.6-80)     |
|                               |                         | Oil             | -              | 0.36 (0.05-2.5) | 2.3 (0.6-8)      | -                 | -              | 150 (4.1-52)    |
| Atlantic Islands <sup>a</sup> | SRB (x10 <sup>3</sup> ) | FI <sup>b</sup> | nd             | 1.0 (1.9-49)    | 4.1 (1.0-27)     | 0.33 (0.1-0.9)    | 4.9 (3-7.1)    | 67 (44-100)     |
|                               |                         | FI-PET          | nd             | 12.8 (3.2-50)   | 7.6 (2-26.8)     | 12.8 (3.2-50)     | 12.8 (3.2-50)  | 48.9 (3.5-57.5) |
|                               |                         | RI              | nd             | 1.3 (0.5-3.6)   | 0.03 (0.01-0.09) | 0.02 (0.008-0.07) | 0.8 (0.3-1.8)  | 3.5 (1.3-9)     |
|                               | IRB (x10)               | FI <sup>b</sup> | nd             | 0.3 (0.04-2.4)  | 1.1 (0.3-3.5)    | -                 | 1.6            | 8.0             |
|                               |                         | FI-PET          | nd             | 4.8 (1.3-17.4)  | 2.4 (0.5-10.9)   | 3.0 (0.7-12.3)    | 3.0 (0.7-12.3) | 30.6 (7.6-122)  |
|                               |                         | RI              | nd             | -               | -                | -                 | -              | -               |

<sup>a</sup> Data taken from Acosta-González *et al.*, 2013 (29).

<sup>b</sup> Average values from FI-OX, FI-TR and FI-AN.

nd, not determined; -, no growth detected.

**Table S4.** Specificity of the *bssA* probe in each sample.

| Site      | Sample | Number of clones <sup>1</sup> |     |
|-----------|--------|-------------------------------|-----|
|           |        | (+)                           | (-) |
| Mallorca  | M-CON  | 51                            | 19  |
|           | M-NAPH | 44                            | 26  |
|           | M-OIL  | 50                            | 20  |
| Figueiras | FI-PET | 68                            | 2   |
|           | FI-OX  | 49                            | 21  |
|           | FI-TR  | 51                            | 19  |
|           | FI-AN  | 53                            | 17  |
|           | RI     | 43                            | 27  |

<sup>1</sup>(+) *bssA*-like sequences; (-) unrelated, non-*bssA* sequences

## References

1. **Coschigano PW, Young LY.** 1997. Identification and sequence analysis of two regulatory genes involved in anaerobic toluene metabolism by strain T1. *Applied and Environmental Microbiology* **63**:652-660.
2. **Leuthner B, Leutwein C, Schulz H, Horth P, Haehnel W, Schiltz E, Schagger H, Heider J.** 1998. Biochemical and genetic characterization of benzylsuccinate synthase from *Thauera aromatica*: a new glycyl radical enzyme catalysing the first step in anaerobic toluene metabolism. *Molecular Microbiology* **28**:615-628.
3. **Achong GR, Rodriguez AM, Spormann AM.** 2001. Benzylsuccinate Synthase of *Azoarcus* sp. Strain T: Cloning, Sequencing, Transcriptional Organization, and Its Role in Anaerobic Toluene and m-Xylene Mineralization. *J Bacteriol* **183**:6763-6770.
4. **Kane SR, Beller HR, Legler TC, Anderson RT.** 2002. Biochemical and genetic evidence of benzylsuccinate synthase in toluene-degrading, ferric iron-reducing *Geobacter metallireducens*. *Biodegradation* **13**:149-154.
5. **Kube M, Heider J, Amann J, Hufnagel P, Kühner S, Beck A, Reinhardt R, Rabus R.** 2004. Genes involved in the anaerobic degradation of toluene in a denitrifying bacterium, strain EbN1. *Archives of Microbiology* **181**:182-194.
6. **Shinoda Y, Sakai Y, Uenishi H, Uchihashi Y, Hiraishi A, Yukawa H, Yurimoto H, Kato N.** 2004. Aerobic and Anaerobic Toluene Degradation by a Newly Isolated Denitrifying Bacterium, *Thauera* sp. Strain DNT-1. *Applied and Environmental Microbiology* **70**:1385-1392.
7. **Shinoda Y, Akagi J, Uchihashi Y, Hiraishi A, Yukawa H, Yurimoto H, Sakai Y, Kato N.** 2005. Anaerobic degradation of aromatic compounds by magnetospirillum strains: isolation and degradation genes. *Biosci Biotechnol Biochem* **69**:1483-1491.
8. **Kasai Y, Kodama Y, Takahata Y, Hoaki T, Watanabe K.** 2007. Degradative Capacities and Bioaugmentation Potential of an Anaerobic Benzene-degrading Bacterium Strain DN11. *Environmental Science & Technology* **41**:6222-6227.
9. **Winderl C, Schaefer S, Lueders T.** 2007. Detection of anaerobic toluene and hydrocarbon degraders in contaminated aquifers using benzylsuccinate synthase (*bssA*) genes as a functional marker. *Environmental Microbiology* **9**:1035-1046.
10. **Beller HR, Kane SR, Legler TC, McKelvie JR, Sherwood Lollar B, Pearson F, Balsler L, Mackay DM.** 2008. Comparative Assessments of Benzene, Toluene, and Xylene Natural Attenuation by Quantitative Polymerase Chain Reaction Analysis of a Catabolic Gene, Signature Metabolites, and Compound-Specific Isotope Analysis. *Environmental Science & Technology* **42**:6065-6072.
11. **Weelink SAB, Van Doesburg W, Saia FT, Rijpstra WIC, Röling WFM, Smidt H, Stams AJM.** 2009. A strictly anaerobic betaproteobacterium *Georgfuchsia toluolica* gen. nov., sp. nov. degrades aromatic compounds with Fe(III), Mn(IV) or nitrate as an electron acceptor. *FEMS Microbiology Ecology* **70**:575-585.
12. **Washer CE, Edwards EA.** 2007. Identification and Expression of Benzylsuccinate Synthase Genes in a Toluene-Degrading Methanogenic Consortium. *Applied and Environmental Microbiology* **73**:1367-1369.
13. **Herrmann S, Vogt C, Fischer A, Kuppardt A, Richnow H-H.** 2009. Characterization of anaerobic xylene biodegradation by two-dimensional isotope fractionation analysis. *Environmental Microbiology Reports* **1**:535-544.
14. **Jehmlich N, Kleinsteuber S, Vogt C, Benndorf D, Harms H, Schmidt F, Von Bergen M, Seifert J.** 2010. Phylogenetic and proteomic analysis of an anaerobic toluene-degrading community. *Journal of Applied Microbiology* **109**:1937-1945.
15. **Abu Laban N, Selesi D, Rattei T, Tischler P, Meckenstock RU.** 2010. Identification of enzymes involved in anaerobic benzene degradation by a strictly anaerobic iron-reducing enrichment culture. *Environ Microbiol* **12**:2783-2796.
16. **Winderl C, Penning H, Netzer Fv, Meckenstock RU, Lueders T.** 2010. DNA-SIP identifies sulfate-reducing *Clostridia* as important toluene degraders in tar-oil-contaminated aquifer sediment. *ISME J* **4**:1314-1325.
17. **Callaghan AV, Davidova IA, Savage-Ashlock K, Parisi VA, Gieg LM, Suflita JM, Kukor JJ, Wawrik B.** 2010. Diversity of Benzyl- and Alkylsuccinate Synthase Genes in Hydrocarbon-Impacted Environments and Enrichment Cultures. *Environmental Science & Technology*.

18. **Yagi JM, Suflita JM, Gieg LM, DeRito CM, Jeon C-O, Madsen EL.** 2010. Subsurface Cycling of Nitrogen and Anaerobic Aromatic Hydrocarbon Biodegradation Revealed by Nucleic Acid and Metabolic Biomarkers. *Applied and Environmental Microbiology* **76**:3124-3134.
19. **Sun W, Cupples AM.** 2012. Diversity of Five Anaerobic Toluene-Degrading Microbial Communities Investigated Using Stable Isotope Probing. *Applied and Environmental Microbiology* **78**:972-980.
20. **Wang L-Y, Li W, Mbadinga SM, Liu J-F, Gu J-D, Mu B-Z.** 2012. Methanogenic Microbial Community Composition of Oily Sludge and Its Enrichment Amended with Alkanes Incubated for Over 500 Days. *Geomicrobiology Journal* **29**:716-726.
21. **Mbadinga S, Li K-P, Zhou L, Wang L-Y, Yang S-Z, Liu J-F, Gu J-D, Mu B-Z.** 2012. Analysis of alkane-dependent methanogenic community derived from production water of a high-temperature petroleum reservoir. *Applied Microbiology and Biotechnology*:1-12.
22. **von Netzer F, Pilloni G, Kleindienst S, Krüger M, Knittel K, Gründger F, Lueders T.** 2012. Enhanced gene detection assays for fumarate-adding enzymes allow uncovering anaerobic hydrocarbon degraders in terrestrial and marine systems. *Applied and Environmental Microbiology*.
23. **Musat F, Galushko A, Jacob J, Widdel F, Kube M, Reinhardt R, Wilkes H, Schink B, Rabus R.** 2009. Anaerobic degradation of naphthalene and 2-methylnaphthalene by strains of marine sulfate-reducing bacteria. *Environ Microbiol* **11**:209-219.
24. **Meckenstock RU, Annweiler E, Michaelis W, Richnow HH, Schink B.** 2000. Anaerobic Naphthalene Degradation by a Sulfate-Reducing Enrichment Culture. *Applied and Environmental Microbiology* **66**:2743-2747.
25. **Wöhlbrand L, Jacob JH, Kube M, Musmann M, Jarling R, Beck A, Amann R, Wilkes H, Reinhardt R, Rabus R.** 2012. Complete genome, catabolic sub-proteomes and key-metabolites of *Desulfobacula toluolica*Tol2, a marine, aromatic compound-degrading, sulfate-reducing bacterium. *Environmental Microbiology*:n/a-n/a.
26. **Callaghan AV, Wawrik B, Ni Chadhain SM, Young LY, Zylstra GJ.** 2008. Anaerobic alkane-degrading strain AK-01 contains two alkylsuccinate synthase genes. *Biochemical and Biophysical Research Communications* **366**:142-148.
27. **Zedelius J, Rabus R, Grundmann O, Werner I, Brodkorb D, Schreiber F, Ehrenreich P, Behrends A, Wilkes H, Kube M, Reinhardt R, Widdel F.** 2011. Alkane degradation under anoxic conditions by a nitrate-reducing bacterium with possible involvement of the electron acceptor in substrate activation. *Environmental Microbiology Reports* **3**:125-135.
28. **Grundmann O, Behrends A, Rabus R, Amann J, Halder T, Heider J, Widdel F.** 2008. Genes encoding the candidate enzyme for anaerobic activation of n-alkanes in the denitrifying bacterium, strain HxN1. *Environmental Microbiology* **10**:376-385.
29. **Acosta-González A, Rosselló-Móra R, Marqués S.** 2013. Characterization of the anaerobic microbial community in oil-polluted subtidal sediments: aromatic biodegradation potential after the Prestige oil spill. *Environ Microbiol* **15**:77-92.
